# Supplementary material for: Interleukin-34 Regulates Th1 and Th17 Cytokine Production by Activating Multiple Signaling Pathways through CSF-1R in Chicken Cell Lines
Source: PubMed Central journal article supplement (PMC6032434; doi:10.3390/ijms19061665), 2018-06-05
Supplement: ijms-19-01665-s001.pdf [file ijms-19-01665-s001.pdf]

## Supplementary

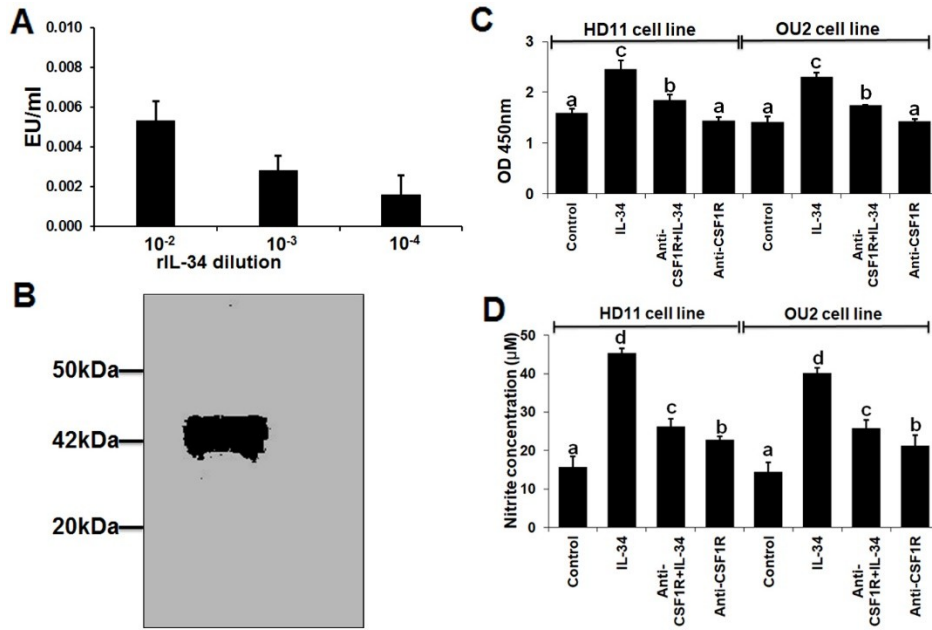

**Figure S1.** (A) Measurement of endotoxin concentrations in the recombinant protein preparations determined by ELISA. A total of 100 µg of protein was used. The initial 100 µg was then diluted 1:100, 1:1000, and 1:10,000 with endotoxin-free PBS. (B) Western blot analysis of chIL-34 recombinant protein using anti-His (C-Term)-HRP antibody. The effects of chIL-34 (200 ng/ml), anti-CSF-1R antibody (10 µg/ml), and anti-CSF-1R antibody (10 µg/ml) and chIL-34 (200 ng/ml) on cell proliferation (B) and NO production (C) by the HD11 and OU2 cell lines. Data ( $n = 3$ ) are expressed as mean  $\pm$  SEM of 3 independent experiments. Values with different superscript characters (a, b, c, and d) indicate significant differences between the control and treatment groups as determined by one-way ANOVA ( $p < 0.05$ ).

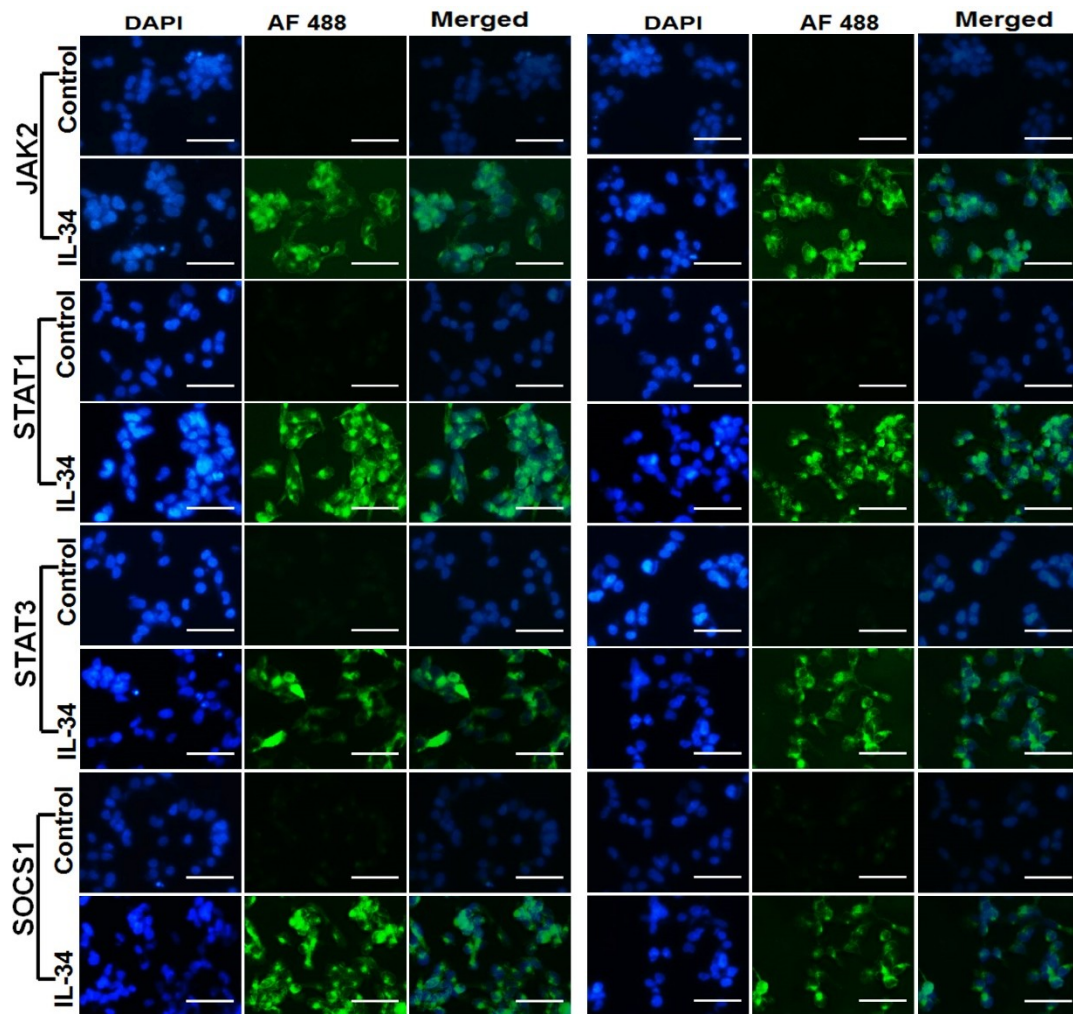

**Figure S2. Immunocytochemical analysis of phosphorylated or unphosphorylated JAK/STAT signaling proteins in chicken cell lines.** The HD11 (A) and OU2 (B) cell lines were stimulated with or without chIL-34 (200 ng/ml) for 60 min. Both untreated and treated cells were incubated with primary antibody, Alexa Fluor® 488 goat anti-rabbit IgG (H+L) secondary antibody, and DAPI (blue). Scale bar represents 25  $\mu$ m.
